# Supplementary material for: Automatic detection of major depressive disorder using electrodermal activity
Source: PubMed Central journal article supplement (PMC6242826; doi:10.1038/s41598-018-35147-3), 2018-11-19
Supplement: 41598_2018_35147_MOESM1_ESM.pdf [file 41598_2018_35147_MOESM1_ESM.pdf]

## **Supplementary Information**

# **Automatic detection of major depressive disorder using electrodermal activity**

**Ah Young Kim<sup>1</sup>, Eun Hye Jang<sup>1</sup>, Seung-Hwan Kim<sup>1</sup>, Kwan Woo Choi<sup>2</sup>, Hong Jin Jeon<sup>2</sup>,  
Han Young Yu<sup>1,\*</sup>, Sangwon Byun<sup>3,\*</sup>**

<sup>1</sup>Bio-Medical IT Convergence Research Division, Electronics and Telecommunications  
Research Institute (ETRI), Daejeon, Korea

<sup>2</sup>Department of Psychiatry, Depression Center, Samsung Medical Center, Sungkyunkwan  
University School of Medicine, Seoul, Korea

<sup>3</sup>Department of Electronics Engineering, Incheon National University, Incheon, Korea

\*Corresponding authors

Correspondence and requests for materials should be addressed to H.Y.Y.  
(email: uhan0@etri.re.kr) or S.B (email: swbyun@inu.ac.kr)

| Feature | Definition                | Formula                                                                                                 |
|---------|---------------------------|---------------------------------------------------------------------------------------------------------|
| MSCL    | Mean amplitude of SCL     | $\frac{1}{N} \sum_{n=1}^N X_n$ , where $X_n = \text{SCL}$                                               |
| SDSCL   | Standard deviation of SCL | $\left( \frac{1}{N-1} \sum_{n=1}^N (X_n - \mu_X)^2 \right)^{\frac{1}{2}}$ , where $\mu_X = \text{MSCL}$ |
| SKSCL   | Skewness of SCL           | $\frac{G_3}{G_2 \sqrt{G_2}}$ , where $G_k = \frac{1}{N} \sum_{n=1}^N (X_n - \mu_X)^k$                   |
| NSSCR   | Non-specific SCR          | $\frac{1}{N} \sum_{n=1}^N Y_n$ , where $Y_n = \text{Amplitude of SCR}$                                  |

**Supplementary Table S1.** Description of EDA features.

| Feature | Group effect<br>(MDD vs. control) |          |                      | Task effect<br>(5 tasks) |          |                      | Interaction<br>(group × task) |          |                      |
|---------|-----------------------------------|----------|----------------------|--------------------------|----------|----------------------|-------------------------------|----------|----------------------|
|         | <i>F</i>                          | <i>P</i> | <i>P<sup>a</sup></i> | <i>F</i>                 | <i>P</i> | <i>P<sup>a</sup></i> | <i>F</i>                      | <i>P</i> | <i>P<sup>a</sup></i> |
| MSCL    | 11.60                             | < 0.001  | 0.002*               | 45.92                    | < 0.001  | < 0.001*             | 0.60                          | 0.610    | 0.732                |
| SDSCL   | 6.21                              | 0.013    | 0.025*               | 53.90                    | < 0.001  | < 0.001*             | 0.09                          | 0.973    | 0.990                |
| SKSCL   | 0.94                              | 0.333    | 0.455                | 31.46                    | < 0.001  | < 0.001*             | 1.13                          | 0.341    | 0.455                |
| NSSCR   | 5.11                              | 0.024    | 0.041*               | 30.02                    | < 0.001  | < 0.001*             | 0.06                          | 0.990    | 0.990                |

**Supplementary Table S2.** Effects of group and task on EDA. Statistical analyses were performed with the non-parametric equivalent of a repeated-measures ANOVA using the R statistics package “nparLD”. Group was used as the between-subjects factor and task as the within-subject factor. *P<sup>a</sup>* represents FDR adjusted *P*-value. Asterisks indicate statistically significant effects after the FDR adjustment (*\*P<sup>a</sup>* < 0.05).

| Derived dataset | Differential feature | MDD          | Control      | <i>P</i> | <i>P</i> <sup>a</sup> |
|-----------------|----------------------|--------------|--------------|----------|-----------------------|
|                 |                      | Mean (SD)    | Mean (SD)    |          |                       |
| D1              | dMSCL                | 0.52 (0.51)  | 0.87 (1.02)  | 0.119    | 0.325                 |
|                 | dSDSCL               | 0.05 (0.09)  | 0.19 (0.63)  | 0.054    | 0.325                 |
|                 | dSKSCL               | -1.40 (1.69) | -0.95 (1.07) | 0.468    | 0.687                 |
|                 | dNSSCR               | 0.06(0.10)   | 0.24 (0.54)  | 0.073    | 0.325                 |
| D2              | dMSCL                | 0.43 (0.57)  | 0.58 (1.35)  | 0.243    | 0.432                 |
|                 | dSDSCL               | 0.01 (0.04)  | 0.01 (0.33)  | 0.142    | 0.325                 |
|                 | dSKSCL               | -0.13 (1.33) | 0.26 (1.26)  | 0.524    | 0.687                 |
|                 | dNSSCR               | 0.01 (0.06)  | 0.01 (0.26)  | 0.519    | 0.687                 |
| D3              | dMSCL                | 0.16 (0.32)  | 0.26 (0.63)  | 0.122    | 0.325                 |
|                 | dSDSCL               | 0.01 (0.03)  | -0.09 (0.58) | 0.796    | 0.849                 |
|                 | dSKSCL               | -0.18 (0.67) | 0.17 (0.80)  | 0.059    | 0.325                 |
|                 | dNSSCR               | 0.01 (0.06)  | -0.09 (0.37) | 0.142    | 0.325                 |
| D4              | dMSCL                | 0.13 (0.50)  | 0.36(1.15)   | 0.210    | 0.420                 |
|                 | dSDSCL               | 0.01 (0.04)  | 0.04 (0.31)  | 0.558    | 0.687                 |
|                 | dSKSCL               | -0.08 (1.21) | 0.34 (1.59)  | 0.618    | 0.706                 |
|                 | dNSSCR               | -0.01 (0.06) | -0.05 (0.13) | 0.934    | 0.934                 |

**Supplementary Table S3.** Group comparison of differential EDA features (Mann-Whitney test between the MDD and control groups, *P*<sup>a</sup> represents FDR adjusted *P*-value).

| Classifier  | Number of features | Accuracy (%) | Sensitivity (%) | Specificity (%) | PPV (%) | NPV (%) |
|-------------|--------------------|--------------|-----------------|-----------------|---------|---------|
| SVM         | 1                  | 57.35        | 54.05           | 61.65           | 65.56   | 53.67   |
|             | 5                  | 63.62        | 63.69           | 54.65           | 65.56   | 71.30   |
|             | 11                 | 62.49        | 61.53           | 55.07           | 64.94   | 68.85   |
|             | 15                 | 61.69        | 60.90           | 53.80           | 64.04   | 68.46   |
|             | 20                 | 61.24        | 60.42           | 52.88           | 63.54   | 68.40   |
|             | 25                 | 60.95        | 60.05           | 52.58           | 63.28   | 68.13   |
|             | 30                 | 60.81        | 59.87           | 52.37           | 63.15   | 68.04   |
|             | 35                 | 60.79        | 59.86           | 52.30           | 63.12   | 68.07   |
| k-NN        | 1                  | 46.64        | 46.34           | 88.02           | 54.20   | 46.00   |
|             | 5                  | 58.37        | 56.70           | 49.82           | 60.91   | 65.70   |
|             | 11                 | 62.44        | 62.24           | 49.98           | 63.56   | 61.30   |
|             | 15                 | 62.35        | 63.73           | 47.83           | 63.19   | 61.32   |
|             | 20                 | 61.33        | 62.12           | 46.53           | 62.17   | 60.27   |
|             | 25                 | 59.71        | 59.89           | 45.03           | 60.82   | 58.66   |
|             | 30                 | 56.71        | 54.92           | 42.33           | 58.50   | 55.68   |
|             | 35                 | 53.72        | 49.63           | 40.62           | 56.37   | 52.79   |
| Naïve Bayes | 1                  | 57.35        | 48.86           | 76.98           | 63.04   | 31.39   |
|             | 5                  | 63.62        | 49.36           | 84.20           | 63.23   | 25.49   |
|             | 11                 | 62.49        | 49.34           | 83.95           | 64.36   | 25.83   |
|             | 15                 | 61.69        | 50.36           | 84.72           | 68.12   | 28.09   |
|             | 20                 | 61.24        | 50.69           | 84.93           | 69.42   | 28.77   |
|             | 25                 | 60.95        | 50.81           | 84.92           | 69.62   | 29.06   |
|             | 30                 | 60.81        | 50.93           | 85.55           | 69.63   | 28.76   |
|             | 35                 | 60.79        | 50.93           | 85.57           | 69.55   | 28.80   |

**Supplementary Table S4.** Performance measures of support vector machine (SVM), k-nearest neighbors (k-NN), Naïve Bayes models estimated using 5-fold cross-validations repeated 200 times.
